# Supplementary material for: Tumor-infiltrating BRAFV600E-specific CD4+ T cells correlated with complete clinical response in melanoma
Source: JCI journal article supplement (doi:10.1172/jci98689), 2018-01-23
Supplement: sd1 [file 1]

## **Materials and methods:**

### **Clinical protocol:**

The patient was enrolled for TIL generation under an FDA-approved IND and a clinical protocol approved by the Institutional Review Board of Fred Hutchinson Cancer Research Center (FHCRC 2643; NCT01807182). Patients with stage IV melanoma, or stage III unlikely to be cured by surgery, >18 years of age, with an ECOG  $\leq 1$ , with a site of metastatic disease that could be safely resected or biopsied, were eligible. TIL were expanded from tumor fragments in 6,000 IU/ml recombinant IL-2 (Proleukin; Novartis), using methodologies developed at the Surgery Branch of the National Cancer Institute(1). TIL cultures were selected based on cell growth and autologous tumor reactivity as determined by IFN- $\gamma$  secretion after co-culture with autologous tumor cells. The TIL were cryopreserved until needed for use, then thawed and further expanded using a rapid expansion protocol, as previously-described(2). The expanded TIL were administered to the patient following a lymphodepleting chemotherapy regimen of cyclophosphamide 60mg/kg/day x 2 days, then fludarabine 25 mg/m<sup>2</sup>/day x 5 days. Within 24 hours of the TIL infusion, the patient received high-dose IL-2 at 600,000 IU/kg IV every 8 hours, for a total of 9 doses. Tumor responses were assessed using RECIST version 1.1 with CT and MRI at weeks 6, 12, and 24, then every 3-6 months, at the discretion of the primary provider.

### **T cell culture:**

Initial stimulations were performed with overlapping 20-mer crude peptides obtained from Elim Biopharma, with 2 peptides spanning each mutation with the mutated residue at position +7 or +13 of the 20 amino acid sequence. Subsequent experiments were performed with >80% purity 21 mer peptides with V600 (wildtype) or E600 (mutant) at position +11. Cryopreserved PBMC were thawed and rested overnight in CTL (RPMI media with L-glutamine and HEPES (Gibco) supplemented with 10% human serum (produced in house), 50  $\mu$ M beta-mercaptoethanol, penicillin and streptomycin, 4 mM L-glutamine and 2ng/ml recombinant human IL-7 (Peprotech). The following morning PBMC were washed and stimulated at 10e6 cells in 5 ml CTL per well of a 6 well plate with a pool of 1 $\mu$ g/ml of each peptide without cytokines. Recombinant IL-2 (Peprotech) was added to a final concentration of 10 U/ml on day +3, and half media changes with supplemental IL-2 were performed on days +3, +6, and +9. On

day +13 cells were used in an ELISA and cytokine staining assays. Antigen specific T cell enrichment was carried out by staining live cells for secreted IFN- $\gamma$  using the IFN- $\gamma$  secretion assay APC (Miltenyi) following the manufacturer's instructions, and using autologous B cells as antigen presenting cells pulsed with 10  $\mu$ g/ml 21-mer BRAF mutant peptide. CD4<sup>+</sup> IFN- $\gamma$  secreting cells were sorted on a FACS Aria2. Sorted cells were rested in CTL supplemented with 10 ng/ml human IL-15 for 5 days, then expanded using a rapid expansion protocol described previously(2). Antigen-specific T cells were further enriched by sorting for Vbeta3.1 positive, CD4<sup>+</sup> cells by staining with anti-Vbeta 3.1 (Thermo Scientific, cat TCR2740), expanded, and cryopreserved at day 13 or 14 after expansion. Cryopreserved cells were thawed and rested overnight in CTL supplemented with 10 U/ml IL-2 prior to assays.

### **Antigen presenting cells**

Autologous B cells were isolated from fresh or thawed PBMC using magnetic beads coated with antibodies recognizing CD19 (Miltenyi, cat 130-050-301) and magnetic positive selection according to the manufacturer's instructions (Miltenyi, cat 13 for 7 days in B cell medium supplemented with 200U/ml human IL-4 (Peprotech) as described (3). B cells were subsequently harvested and restimulated with 3T3 CD40L and fresh medium every 3 days. B cells were used in assays at day +3 of stimulation 2 or 3.

### **Phenotyping of tumor infiltrating lymphocytes**

Cells were thawed, washed, and counted using Trypan blue and pre-incubated with Fc receptor blocking solution (Biolegend) to reduce non-specific binding and subsequently stained in two panels with fluorochrome-conjugated anti-human antibodies against CD45, CD3, CD4, CD8, CD56, gdTCR, CD25, CD127, CCR7, CD45RA, PD1 and TIM3 for 30 min on ice, washed and stained with fixable viability dye (FVD, eBioscience), before fixation (IC fixation buffer, eBioscience). Intracellular cytokine expression was measured using flow cytometry. Cells were cultured in RPMI-1640 with 10% FBS, 1% Pen/Strep, 50ng/ml 1 PMA, 1mg/ml 1 ionomycin for 5h at 37°C with 5% CO<sub>2</sub>. GolgiStop (monensin) was added for the last 2 h. Following stimulation, cells were washed, resuspended and stained with FVD. Subsequently, cells were fixed and permeabilized using a BD Cytofix/Cytoperm kit and stained for 30 min at 4 °C with fluorochrome-conjugated antibodies against CD45, CD3, CD4, CD8, gdTCR, IFN $\gamma$ , IL-17A and

IL-22.

### **mRNA transfection**

RNA expression targeted to the endosome was carried out using the method described by the Sahin group(4) where antigens are targeted to the endosome by fusion of the antigen to class I MHC sorting signals. The mRNA expression construct pJV57 was constructed by gene synthesis (Geneart, Life Sciences), which contained a T7 promoter fused to the N terminal 25 amino acids of the human HLA-B gene, followed by a BamHI restriction site, the coding sequence of enhanced GFP, an AgeI restriction site, the C terminal 55 amino acids of the human HLA-B gene, followed by the human beta globin untranslated region followed by a 30 nucleotide poly A tail followed by a SapI restriction site directing cleavage in the poly A tail. pJV84 was cloned by ligating the following into AgeI/BamHI digested pJV57: annealed oligonucleotides (Ultramers, Integrated DNA Technologies) encoding BRAF amino acids 575-624 flanked by a 5' AgeI and 3' BamHI site containing the E600 substitution. pJV85 was made by ligating annealed oligonucleotides (Ultramers, Integrated DNA Technologies) encoding BRAF amino acids 575-624 flanked by a 5' AgeI and 3' BamHI site containing the wildtype V600 amino acid. 3 tandem minigenes encoding 27-mer peptide sequences for 10, 10 and 9 (29 total) mutations or the coding sequences of tyrosinase, SSX2, MageA3, Mart1 and GP100 were codon optimized, constructed by gene synthesis (Geneart, Life Sciences) and cloned into the AgeI/BamHI sites of JV57.

pJV84 and pJV85 and other plasmids based on JV57 were linearized with SapI (Thermo Fisher) and mRNA was in vitro transcribed using the Highscribe T7 ARCA mRNA kit (New England Biolabs) and purified by lithium precipitation according to the manufacturer's instructions. mRNA was electroporated into CD40L stimulated B cells 16 hours prior to co-culture experiments as described (3).

### **Cytokine release assays**

In ELISA assays, 50,000 effector T cells were incubated in 96 well round bottom plates with 100,000 B cells or B-LCL lines and 10 µg/ml or specific concentrations of peptides in RPMI (Gibco) supplemented with 5% heat inactivated fetal bovine serum. IFN-γ in supernatants was quantitated using the ready set go human IFN-γ ELISA kit (eBioscience) in technical triplicate.

HLA blocking experiments were carried out with 20 µg/ml antibody anti class I (Biolegend, cat 311411) anti HLA DR (clone L243, cat 307611) and HLA-DQ (Abcam, clone spv-13, cat. ab23632) added 1 hour prior to adding peptide. For elispot assays, 50,000 tumor infiltrating lymphocytes were incubated with 200,000 autologous B cells pulsed with peptide pools at a final concentration of 10 µg/ml of each peptide in CTL medium using the human IFN-γ ELISpot-Pro kit (Mabtech) and developed using the manufacturer's instructions.

### **TCR Vb and Va sequencing:**

DNA from clinical samples were isolated using the Qiagen DNeasy or Qiamp micro DNA kits according to the manufacturer's instructions. TCRB sequencing was carried out using the human TCRB sequencing kit (Adaptive Biotechnology) following the manufacturer's instructions and sequenced using a MiSeq (Fred Hutchinson Cancer Research Center Genomics core) with data analysis carried out by Adaptive biotechnology software. TCRA sequencing was carried out using the human TCRA sequencing service (Adaptive Biotechnology).

### **HLA identification**

LCL cell lines 1331, DUCAF, VAVY, BM14, DEM and DEU were obtained from the research cell bank (Seattle, WA). The remainder of the cell lines were a generous gift from Marie Bleakley, Fred Hutchinson Cancer Research Center. For coculture assays, LCL cell lines were pulsed with 10 µg/ml of BRAF mutant peptide or DMSO control for 4 hours and then washed 3 times with PBS prior to ELISA assay. For identification of specific class II alleles, codon optimized linear DNA fragments encoding HLA-DRB1 0404 protein or the HLA-DQB1 0302 protein linked by a T2A skip sequence to HLA-DQA1 0301 protein were synthesized genestrings (Life Sciences). and cloned into the vector MP71(5) linearized with NotI and EcoRI (Thermo Fisher) using the NEBuilder cloning kit (New England Biolabs) and sequence verified. Retroviral transduction was performed as described(6) into the VAVY cell line homozygous for HLA DRB1 0301 DQA1 0501 and DQB1 0201 (Research cell bank). Cells positive for DRB1 0404 were sorted on a FACSAria2 sorter using the antibody DRB1-PE (Biolegend, cat 362303) and cells positive for DQB1 03 DQA1 03 were sorted using the anti DQ antibody clone HLADQ1-FITC (Biolegend, cat 318104).

### **T cell receptor construction**

TCR construction was in the vector PRRL(7) further modified by introducing six point mutations into the start codon and putative promoter region of the woodchuck hepatitis virus X protein as in (8) with the beta chain followed by a P2A translational skip sequence followed by the alpha chain with cysteines introduced to facilitate pairing(9). A codon optimized DNA fragment containing the TRBV28 and CDR3 and TRBJ1-3 sequences followed by TCRB1 sequence with a cysteine substituted at residue 57 followed by a P2A skip sequence and the TRAV21 and CDR3 sequences followed by TRAJ43 and TRAC sequences was synthesized as a genestring (Life Sciences) and cloned using the NEBuilder cloning kit (New England Biolabs) into the vector PRRL-SIN linearized with PstI and AscI (Thermo Fisher) and sequence verified. One week after transduction, cells were sorted based on Vbeta3.1 expression using antibody clone 8F10 (Thermo Scientific, cat TCR2740) and expanded via rapid expansion as described above. T cells were used in assays or cryopreserved on day 14 of the rapid expansion.

### **Nucleic acid preparation for exome capture and RNA sequencing:**

Post-treatment blood was used to isolate non-tumor DNA. A single-cell suspension derived from the iliac nodal tumor recurrence was flow sorted (propidium iodide negative and CD45 negative) to deplete abundant infiltrating lymphocytes and enrich for neoplastic cells. Normal tissue and sorted tumor cells were processed with the Qiagen DNA/RNA AllPrep Micro kit to isolate DNA for exome capture, with RNA reserved for subsequent RNA-seq profiling. Genomic DNA concentration was quantified on an Invitrogen Qubit® 2.0 Fluorometer (Life Technologies-Invitrogen, Carlsbad, CA, USA) and Trinean DropSense96 spectrophotometer (Caliper Life Sciences, Hopkinton, MA).

### **HLA typing:**

High resolution HLA typing was carried out by the CLIA approved clinical HLA typing laboratory at the Fred Hutchinson Cancer Research Center.

### **Whole exome sequencing:**

Exome sequencing libraries were prepared using the Agilent SureSelectXT Reagent Kit and exon targets isolated using the Agilent All Human Exon v6 (Agilent Technologies, Santa Clara, CA,

USA). 200 ng of genomic DNA was fragmented using a Covaris LE220 focused-ultrasonicator (Covaris, Inc., Woburn, MA, USA) and libraries prepared and captured on a Sciclone NGSx Workstation (PerkinElmer, Waltham, MA, USA). Library size distributions were validated using an Agilent 2200 TapeStation. Additional library QC, blending of pooled indexed libraries, and cluster optimization was performed using Life Technologies' Invitrogen Qubit® 2.0 Fluorometer.

The resulting libraries were sequenced on an Illumina HiSeq 2500 using a paired-end 100bp (PE100) strategy. Image analysis and base calling was performed using Illumina's Real Time Analysis v1.18 software, followed by “demultiplexing” of indexed reads and generation of FASTQ files using Illumina's bcl2fastq Conversion Software v1.8.4 ([http://support.illumina.com/downloads/bcl2fastq\\_conversion\\_software\\_184.html](http://support.illumina.com/downloads/bcl2fastq_conversion_software_184.html)). Read pairs passing standard Illumina quality filters were retained for further analysis, yielding 77M read pairs for the tumor and 89M read pairs for the normal. Paired reads were aligned to the human genome reference (GRCh37/hg19) with the BWA-MEM short-read aligner(10, 11). The resulting alignment files, in standard BAM format, were processed by Picard 2.0.1 and GATK 3.5(12) for quality score recalibration, indel realignment, and duplicate removal according to recommended best practices(13).

The resulting alignments were checked for quality and consistency using several tools. The GATK DepthOfCoverage tool confirmed that mean coverage of the 60MB capture region is 107X and 125X for the tumor and normal WES alignments respectively. The GATK DiagnoseTargets command determined that 97% of the capture regions were of sufficient quality to call variants (ie. were not LOW\_COVERAGE, POOR\_QUALITY, etc.). We next used ConPair(14) to verify that the tumor and normal were correctly paired and that there was minimal cross-contamination between the two. Conpair confirmed that the two samples are from the same individual (concordance 0.99) and that both the tumor and normal sample contamination levels are less than 0.1%.

To call somatic mutations from the analysis-ready tumor and normal BAM files, we used three independent software packages: MuTect 1.1.7(15), Strelka 1.0.14(16), and VarScan.v2.4.1(17). Variant calls from all tools, in VCF format, were annotated with Oncotator(18). Annotated

missense somatic variants were combined into a single summary as follows. First, any mutation annotated as “somatic” but present in dbSNP was removed if it was not also present in COSMIC or its minor allele frequency was greater than 1% (according to the UCSC Genome Browser snp150Common table). Variants supported by two or more variant callers were retained and those supported by only one variant caller were subject to manual inspection.

In addition to single-base changes in code, three potential splice-site mutations were identified by two or more variant callers. Inspection of RNA-seq data near these sites showed no evidence of discernible effect on splicing, so these three mutations were excluded from further consideration. VarScan and Strelka are capable of detecting somatic insertions and deletions as well, but the two callers reported only two frameshift deletions in common. On inspection both were found to be likely alignment errors also present in the normal sample.

### **RNA-Seq data processing:**

To rank candidate peptides by observed expression level, we also performed RNA-seq on flow-sorted tumor cells from the same single cell suspension. RNA-seq libraries were prepared from total RNA using the TruSeq RNA Sample Prep v2 Kit (Illumina, Inc., San Diego, CA, USA) and a Sciclone NGSx Workstation (PerkinElmer, Waltham, MA, USA). Library size distributions were validated using an Agilent 2200 TapeStation (Agilent Technologies, Santa Clara, CA, USA). Additional library QC, blending of pooled indexed libraries, and cluster optimization was performed using Life Technologies’ Invitrogen Qubit® 2.0 Fluorometer (Life Technologies-Invitrogen, Carlsbad, CA, USA). The library was sequenced on an Illumina HiSeq 2500 to generate 133M 50nt paired reads (PE50). Reads were aligned to a RefSeq derived reference transcriptome with RSEM 1.2.19(19). Gene-level expression values from RSEM, in TPM units, were added to our summary of missense somatic variants.

### **DQ proteins and tetramers**

Recombinant DQ8 (DQA1:0301/DQB1:0302) proteins were produced as previously described(20). Briefly, soluble DQ proteins were purified from insect cell culture supernatants by affinity chromatography. For the preparation of HLA class II tetramers, DQ proteins were in vivo biotinylated in *Drosophila* S2 cells prior to harvest and exchanged to citric/phosphate

buffer, pH 5.4. The biotinylated monomer was loaded with 0.2 mg/ml of peptide by incubating at 37°C for 72 h in the presence of 0.2 mg/ml n-Dodecyl- $\beta$ -maltoside and 1 mM Pefabloc SC (Sigma–Aldrich, St. Louis, MO). Peptide loaded monomers were subsequently conjugated into tetramers using R-PE streptavidin (Biosource International, Camarillo, CA) at a molar ratio of 8:1.

### **T cell clone isolation**

BRAF-specific T cell clones were generated by performing single-cell sort on tetramer-positive CD4<sup>+</sup> cells from direct *ex vivo* staining using a FACS Aria II. Clones were expanded in a 96-well plate in the presence of  $1.0 \times 10^5$  irradiated PBMCs, 2  $\mu$ g/ml phytohemagglutinin (Remel Inc. Lenexa, KS), and IL-2 (10U/ml). After expansion of each T cell clone into a single 48 well, clones were incubated with autologous B cells pulsed with the 15-mer BRAF V600E peptide and IFN- $\gamma$  production was measured by ELISA.

### **HLA-DQ8/BRAF tetramer enrichment and analysis**

*Ex vivo* HLA-DQ8/BRAF tetramer staining and enrichment was done as previously described (*Int Immunol* 25(8): 447–457, 2014). 30-40 million PBMC were thawed and rested overnight at room temperature. Tetramer staining was performed in the 5ml polystyrene FACS tubes (BD Biosciences, San Jose, CA, USA) at 150-200 million PBMC/ml in 200  $\mu$ l T-cell culture medium (RPMI 1640 (GIBCO, Life Technologies, Carlsbad, CA, USA) with 10% in-house pooled human serum and 1% Penicillin Streptomycin (GIBCO, Life Technologies, Carlsbad, CA, USA)). 6 $\mu$ l of tetramer was added to the cell suspension and incubated at room temperature for 2 hours. After tetramer staining, cells were incubated with 40 $\mu$ l anti-PE magnetic beads and enriched using magnetic columns based on manufacturer's instructions (Miltenyi Biotec, Auburn, CA, USA). Before enrichment, 1/100<sup>th</sup> cell fraction was set aside for antibody staining ('Pre'). All fluorescent antibodies were obtained from BioLegend (San Diego, CA, USA) unless otherwise stated. Enriched samples were stained with fluorescent antibody cocktail containing anti-CXCR3 FITC (clone G025H7), anti-CD14 PerCP Cy5.5 (clone 61D3) (eBioscience, Waltham, MA, USA), anti-CD19 PerCP Cy5.5 (clone SJ25C1) (eBioscience, Waltham, MA, USA), anti-PD-1 PECy7 (clone EH12.2H7), anti-KLRG1 APC (clone SA231A2), anti-CCR7 APCCy7 (clone G043H7), anti-CD45RA Alexa Fluor® 700 (clone HI100), anti-CCR6 BV421

(clone G034E3), anti-CCR4 BV510 (clone L291H4), CLA-BV605 (clone HECA-452) (BD Biosciences, San Jose, CA, USA), anti-CD27 BV650 (clone 0323) and anti-CD4 BUV737 (clone SK3) (BD Biosciences, San Jose, CA, USA). Both 'Pre' and enriched samples were incubated at room temperature for 20 minutes. ViaProbe (Miltenyi Biotec, Auburn, CA, USA) was added to the samples before analysing on the flow cytometer, BD FACSAria Fusion (BD Biosciences, San Jose, CA, USA). CD14, CD19 and ViaProbe were used to exclude monocytes, B-cells and dead cells from post-acquisition analysis. Sample analysis was done with FlowJo, LLC (BD Biosciences, San Jose, CA, USA).

### **Intracellular cytokine staining**

PBMC from post-treatment melanoma patients were resuspended in T cell medium at a concentration of 5 million/mL. Cells were stimulated with 1  $\mu$ l of 20 mg/mL BRAF V660E peptide (GDFGLATEKSRWSGS) for 7 hours. Golgistop (BD Biosciences) was added to the culture at 1:1500 dilution 3 hours before harvest. After incubation, cells were stained with anti-CD154 PE (clone 5C8, Miltenyi Biotec) at room temperature for 10 min, followed by incubation with anti-PE bead at 4°C for an additional 10 min (Miltenyi Biotec). CD154+ cells were enriched using magnetic columns based on manufacturer's instructions (Miltenyi Biotec). Enriched cells were stained with surface antibodies including anti-CD4 BV650 (clone SK3, BioLegend), anti-CD14 Pacific Blue (clone M5E2, BioLegend). Anti-CD19 Pacific Blue (clone HIB19, BioLegend), anti-CD45RA BV510 (clone HI100, BD Biosciences) as well as Fixable Viability Stain 450 (BD Horizon). After surface staining, cells were fixed and permeabilized as per the manufacturer's instructions (eBioscience). Cells were next stained with antibodies against IFN- $\gamma$  Alexa Fluor® 700 (clone 4S.B3, BioLegend), IL-4 FITC (clone 8D4-8, eBioscience), IL-10 PE/Cy7 (clone JES3-9D7, BioLegend), IL-17A APC/Cy7 (clone BL168, BioLegend), IL-21 APC (clone eBio3A3-N2, eBioscience), and TNF- $\alpha$  (clone MAb11, eBioscience) for 20 minutes at room temperature. Cells were washed and immediately analyzed on a BD LSRFortessa multi-color flow cytometer.

### **Supplemental figures and tables:**

Figure S1.

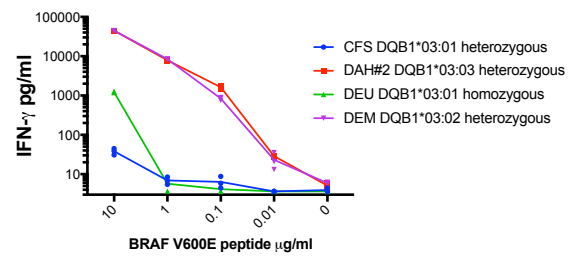

**Figure S1**

IFN- $\gamma$  release by patient derived BRAF<sup>V600E</sup>-specific T cells incubated with allogeneic B-LCL cell lines expressing HLA DQB1 03 alleles and pulsed with the indicated amount of 21-mer BRAF<sup>V600E</sup> peptide with 3 technical replicates.

Figure S2

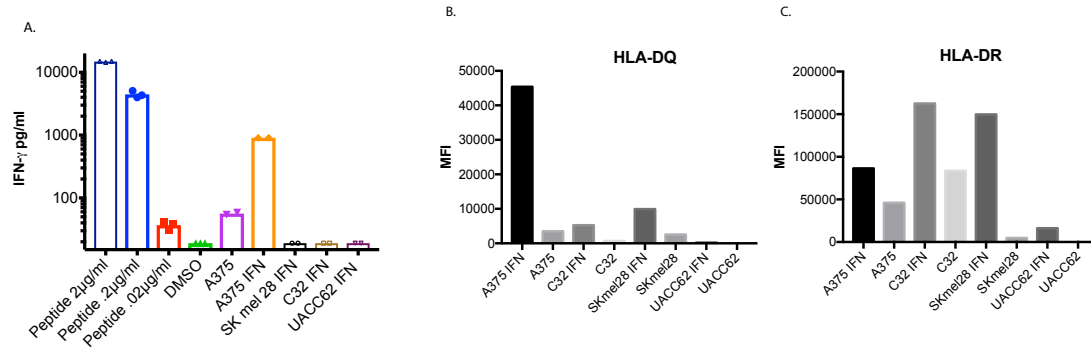

**Figure S2.**

A) IFN- $\gamma$  release by patient derived BRAF<sup>V600E</sup>-specific T cells incubated with autologous B cells pulsed with BRAF<sup>V600E</sup> peptide or the indicated tumor cell lines with and without pretreatment with human IFN- $\gamma$  500 U/ml for 3 days. 3 technical replicates were performed. B,C) Expression of HLA-DQ (B) and HLA-DR (C) on tumor cell lines with and without IFN- $\gamma$  pre-treatment quantitated by flow cytometry relative to the isotype control.

Figure S3

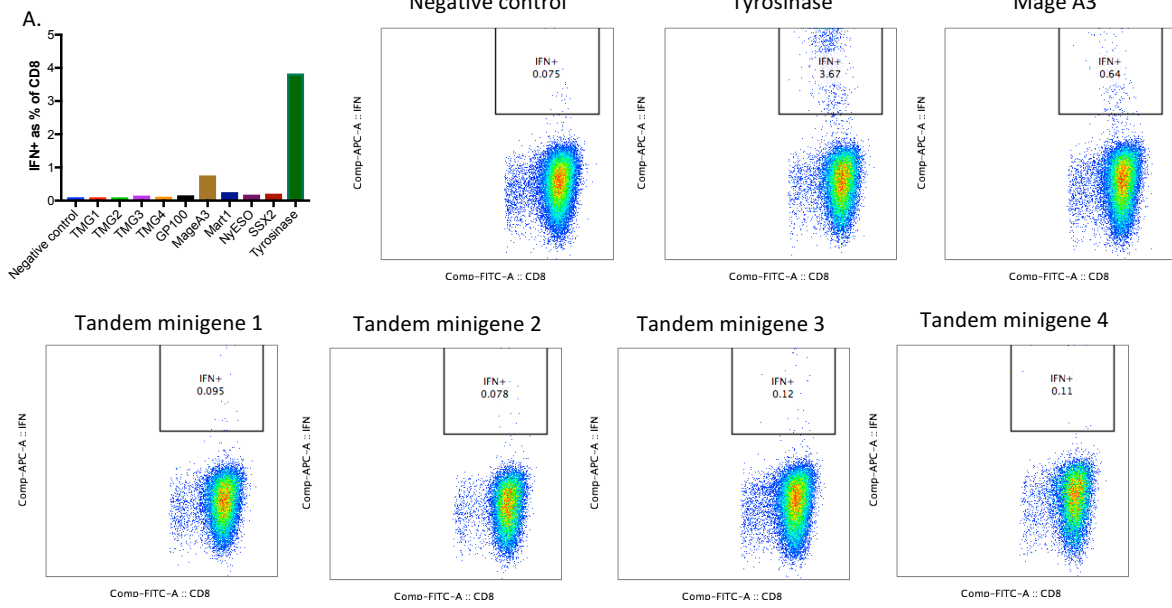

**Figure S3.**

Tumor infiltrating lymphocytes were incubated with autologous B cells transfected with tandem minigenes encompassing 29 non-synonymous mutations or the coding sequences from self antigens Tyrosinase, Mage A3, Mart1, SSX2, and GP100 in the presence of brefeldin A and IFN- $\gamma$  production was measured in CD8+ T cells by intracellular cytokine staining.

Figure S4

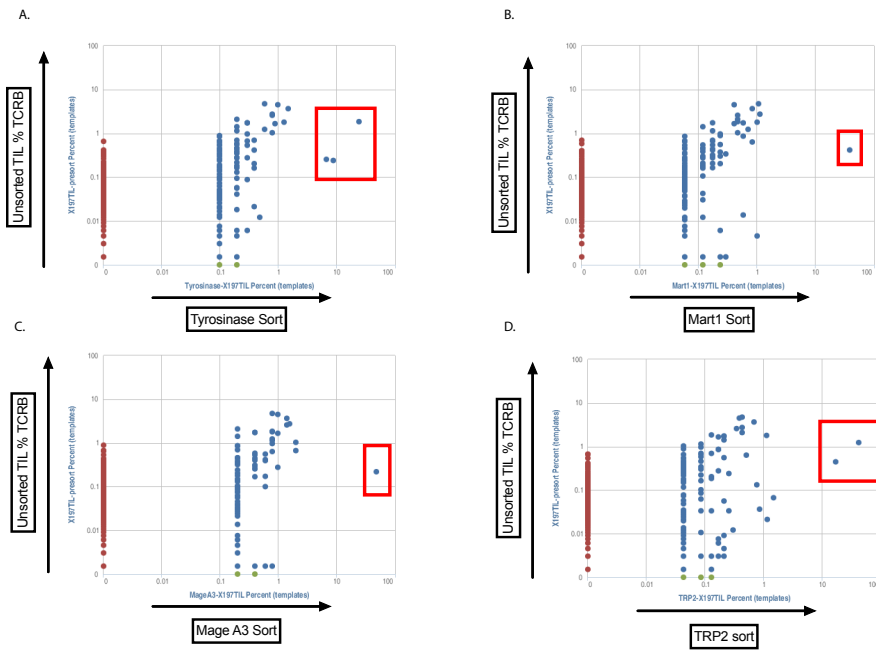

**Figure S4.**

TCRB sequencing on the TIL and T cells from TIL incubated with autologous B cells and tiled peptides spanning (A) Tyrosinase, (B) Mart1, (C) Mage A3, and (D) TRP2 and sorted by IFN- $\gamma$  capture. Antigen specific TCRB sequences enriched in the sorted cells are marked with a red box.

| Symbol  | Chrm  | Pos       | Nucleotide  | Amino Acid |   | Ref # | Alt # | VAF | 27-mer amino acid sequence | Mutation in DNA              | Mutation in RNA | 20-mer peptide 1 | 20-mer peptide 2      | TPM in RNA            |       |
|---------|-------|-----------|-------------|------------|---|-------|-------|-----|----------------------------|------------------------------|-----------------|------------------|-----------------------|-----------------------|-------|
| AP1M1   | chr19 | 16339014  | AP1M1.A>C   | p.I295L    | A | C     | 240   | 67  | 21.8%                      | VIEKHSRSRIEYMLKAKSQFKRRSTAN  | yes             | yes              | VIEKHSRSRIEYMLKAKSQF  | SRIEYMLKAKSQFKRRSTAN  | 61.33 |
| BRAF    | chr7  | 140453136 | BRAF.A>T    | p.V600E    | A | T     | 31    | 17  | 35.4%                      | DLTVKIGDFGLATEKSRWSGSHQFEQL  | yes             | yes              | DLTVKIGDFGLATEKSRWSG  | DFGLATEKSRWSGSHQFEQL  | 10.83 |
| DCAF6   | chr1  | 167973908 | DCAF6.G>A   | p.A419T    | G | A     | 52    | 74  | 58.7%                      | EQFLQPTSSSTMSTQAHSTSSPTESPH  | yes             | yes              | EQFLQPTSSSTMSTQAHST   | TSSTMSTQAHSTSSPTESPH  | 41.11 |
| GTF2H4  | chr6  | 30879921  | GTF2H4.C>T  | p.T319M    | C | T     | 108   | 16  | 12.9%                      | FIVVETNYRLYAYMESELQIALIALFS  | yes             | yes              | FIVVETNYRLYAYMESELQI  | YRLYAYMESELQIALIALFS  | 49.95 |
| NBPF12  | chr1  | 146450115 | NBPF12.A>G  | p.E2471G   | A | G     | 35    | 25  | 41.7%                      | DSCQPYRSFYALGKHKVGFSLDVGEI   | yes             | yes              | DSCQPYRSFYALGKHKVGF   | SSFYALGKHKVGFSLDVGEI  | 12.5  |
| ORC3    | chr6  | 88318940  | ORC3.A>C    | p.I236L    | A | C     | 27    | 5   | 15.6%                      | ESFATKVLQDFIILSSQHLHEFFLILI  | yes             | yes              | ESFATKVLQDFIILSSQHLH  | LQDFIILSSQHLHEFFLILI  | 19.92 |
| ROR1    | chr1  | 64475043  | ROR1.A>G    | p.N53S     | A | G     | 33    | 25  | 43.1%                      | LVPTSSWNISSELSKDSYLTLDPEMNN  | yes             | yes              | LVPTSSWNISSELSKDSYLT  | NISSELSKDSYLTLDPEMNN  | 4.69  |
| SF3B1   | chr2  | 198273138 | SF3B1.T>C   | p.T358A    | T | C     | 29    | 7   | 19.4%                      | QMGGSTPVLTPGKAPIGTPAMNMATPT  | yes             | yes              | QMGGSTPVLTPGKAPIGTPA  | VLTGKAPIGTPAMNMATPT   | 105.2 |
| UNKL    | chr16 | 1453173   | UNKL.C>T    | p.V154I    | C | T     | 50    | 32  | 39.0%                      | AHGPLDLRPPVCDIRELQAEALQNGQ   | yes             | yes              | AHGPLDLRPPVCDIRELQAO  | RPPVCDIRELQAEALQNGQ   | 6.72  |
| ZNF700  | chr19 | 12059700  | ZNF700.T>G  | p.F287L    | T | G     | 68    | 20  | 22.7%                      | GEKPYECSKCDKALHSSSSYHRHERSH  | yes             | yes              | GEKPYECSKCDKALHSSSSY  | SKCDKALHSSSSYHRHERSH  | 8.69  |
| NVL     | chr1  | 224484275 | NVL.T>G     | p.T370P    | T | G     | 37    | 13  | 26.0%                      | APCFIIFIDEIDAIPPKREVAASKMERR | yes             | yes              | APCFIIFIDEIDAIPPKREVA | DEIDAIPPKREVAASKMERR  | 18.42 |
| MATN1   | chr1  | 31191789  | MATN1.T>G   | p.T153P    | T | G     | 47    | 62  | 56.9%                      | SRSPLDISKVVIVPDGRPQDSVQDVSA  | yes             | yes              | SRSPLDISKVVIVPDGRPQD  | KVVIVVDPGRPQDSVQDVSA  | 0.14  |
| CTNNA2  | chr2  | 80136918  | CTNNA2.A>C  | p.N351H    | A | C     | 139   | 32  | 18.7%                      | VRQALQDLLSEYMHNTGRKEGDPPLNI  | yes             | no               | VRQALQDLLSEYMHNTGRKE  | LLSEYMHNTGRKEGDPPLNI  | 2.36  |
| GET4    | chr7  | 925731    | GET4.T>G    | p.L65R     | T | G     | 148   | 47  | 24.1%                      | RYMSQSKHTEARERMSYGALLFFSHGQ  | yes             | no               | RYMSQSKHTEARERMSYGAL  | HTEARERMSYGALLFFSHGQ  | 26.97 |
| NTNG1   | chr1  | 107867468 | NTNG1.G>A   | p.V271I    | G | A     | 26    | 26  | 50.0%                      | TVTDLRIRLLRPAIGEIFVDLHLARY   | yes             | yes              | TVTDLRIRLLRPAIGEIFVD  | RLLRPAIGEIFVDLHLARY   | 0.73  |
| SPTBN5  | chr15 | 42147465  | SPTBN5.G>A  | p.T3127I   | G | A     | 113   | 52  | 31.5%                      | TLLLDLAWLTKRAAIAESQDYQDLEGV  | yes             | yes              | TLLLDLAWLTKRAAIAESQDY | LTTKAAIAESQDYQDLEGV   | 1.11  |
| DPP6    | chr7  | 154143393 | DPP6.C>T    | p.S113L    | C | T     | 33    | 24  | 42.1%                      | LLVILVICSLIVTLVILLTPAEDNSLS  | yes             | no               | LLVILVICSLIVTLVILLTP  | CSLIVTLVILLTPAEDNSLS  | 0.03  |
| HIAT1   | chr1  | 100525467 | HIAT1.G>T   | p.G93C     | G | T     | 19    | 7   | 26.9%                      | VRGLLSFSLAPLICALSDVWGRKSPFL  | yes             | no               | VRGLLSFSLAPLICALSDVW  | LSAPLICALSDVWGRKSPFL  | 46.71 |
| ITGA4   | chr2  | 182350641 | ITGA4.G>T   | p.V359F    | G | T     | 55    | 16  | 22.5%                      | GSGAVMNAMETNLFGSDKYAARFGESI  | yes             | no               | GSGAVMNAMETNLFGSDKYA  | AMETNLFPGSDKYAARFGESI | 4.59  |
| MYO1A   | chr12 | 57422622  | MYO1A.C>T   | p.V1017I   | C | T     | 95    | 31  | 24.6%                      | SVRFKENSVAVKVIQGPAGGDNKSLRY  | yes             | no               | SVRFKENSVAVKVIQGPAGG  | SVAVKVIQGPAGGDNKSLRY  | 0.05  |
| B4GALT5 | chr20 | 48257072  | B4GALT5.T>G | p.Y246S    | T | G     | 81    | 7   | 8.0%                       | HDVDHVPESDRVYSGCGQMPRHFPATKL | yes             | yes              |                       |                       | 45.21 |
| ITCH    | chr20 | 33045210  | ITCH.G>A    | p.S450N    | G | A     | 41    | 4   | 8.9%                       | LGPLPGWEKRTDNNGRVYFVHNTRI    | yes             | no               |                       |                       | 23.48 |
| KMT2B   | chr19 | 36220941  | KMT2B.T>G   | p.F1664C   | T | G     | 144   | 9   | 5.9%                       | VGCCSSCLSNFHCARASAYCIPQDD    | yes             | no               |                       |                       | 12.6  |
| SMC1B   | chr22 | 45749929  | SMC1B.G>T   | p.Q1068K   | G | T     | 40    | 4   | 9.1%                       | FEQVKRRYDLFTKCFEHSVSIIDQIY   | yes             | no               |                       |                       | 0.57  |
| SPG11   | chr15 | 44877944  | SPG11.G>T   | p.H1671N   | G | T     | 46    | 3   | 6.1%                       | HTIITSYSIENLQNCRSILERLQTDG   | yes             | no               |                       |                       | 19.43 |
| ZNF148  | chr3  | 124953119 | ZNF148.T>C  | p.H241R    | T | C     | 13    | 3   | 18.8%                      | RCDECGMRFIQKRYMERHKRTHSGEKP  | yes             | no               |                       |                       | 7.62  |
| ZNF658  | chr9  | 40774255  | ZNF658.A>C  | p.H340Q    | A | C     | 103   | 7   | 6.4%                       | SNKCEENFSQSSAQIVHQKTAQGDKFG  | yes             | yes              |                       |                       | 2.76  |
| USP2    | chr11 | 119230366 | USP2.A>C    | p.F277C    | A | C     | 153   | 9   | 5.6%                       | OGLAGLRNLGNTCCMNSILQCLNSNRE  | yes             | yes              |                       |                       | 7.03  |
| SLC19A3 | chr2  | 228560627 | SLC19A3.T>G | p.M384L    | T | G     | 46    | 5   | 9.8%                       | ACYAGVLIPIKSSVLLLTITAVPQIAVN | yes             | no               |                       |                       | 2.34  |

**Table S1**

Nonsynonymous mutations in patient melanoma identified by whole exome sequencing and peptides used in subsequent experiments. Annotations include chromosomal position using GRCh37/hg19 reference assembly, nucleotide and amino acid substitutions, whether the mutation was observed in DNA or RNA-seq, the variant allele frequency (VAF), and RNA-seq expression in units of transcripts per million (TPM).

| Cell line name | BRAF V600E Peptide | Mean IFN-G pg/ml | HLA DRB1   | HLA DQB1   |
|----------------|--------------------|------------------|------------|------------|
| 1331           | -                  | 10               | 404        | 302        |
|                | +                  | 41791            |            |            |
| CFS            | -                  | 10               | 0401, 0101 | 0301, 0501 |
|                | +                  | 1547             |            |            |
| DEM            | -                  | 23               | 0401, 1602 | 0302, 0502 |
|                | +                  | 29873            |            |            |
| DEU            | -                  | 6                | 401        | 301        |
|                | +                  | 10359            |            |            |
| FAL            | -                  | 9                | 0403, 0801 | 03BG, 0402 |
|                | +                  | 31620            |            |            |
| BM14           | -                  | 536              | 401        | 302        |
|                | +                  | 42832            |            |            |
| DMB            | -                  | 38               | 0101, 1501 | 0501, 0602 |
|                | +                  | 7                |            |            |
| DLM            | -                  | 26               | 0403, 0801 | 03BG, 0402 |
|                | +                  | 39388            |            |            |
| AMM            | -                  | 6                | 0802, 1501 | 0402, 06WG |
|                | +                  | 9                |            |            |
| CLC            | -                  | 9                | 0301, 1104 | 02AB, 0301 |
|                | +                  | 6                |            |            |
| BP             | -                  | 35               | 1601, 1101 | 0502, 0301 |
|                | +                  | 36               |            |            |
| JWP            | -                  | 12               | 0701, 0701 | 02AB, 0303 |
|                | +                  | 359              |            |            |
| DAH2           | -                  | 17               | 09, 1501   | 0303, 06W6 |
|                | +                  | 49784            |            |            |
| VRM            | -                  | 6                | 0701, 10   | 0303, 0501 |
|                | +                  | 188              |            |            |

**Table S2**

IFN- $\gamma$  production by patient BRAF<sup>V600E</sup>-specific CD4<sup>+</sup> T cells after incubation with allogeneic B-LCL cell lines expressing different HLA class II alleles, alone or pulsed with 10  $\mu$ g/ml of BRAF<sup>V600E</sup> peptide. The complete patient HLA typing was as follows:

A\*11:01:01/A\*24:02:01

B\*15:01:01/B\*40:01:02

C\*03:03:01/C\*03:04:01

DPA1\*01:03:01/DPA1\*01:03:01

DPB1\*04:01:01/DPB1\*04:01:01

DQA1\*03:01:01/DQA1\*03:02

DQB1\*03:02:01/DQB1\*03:03:02

DRB1\*04:03:01/DRB1\*09:01:02

DRB4\*01:03:01/DRB4\*01:03:02

Table S3 Phenotype of final TIL product

| % of live |           | % of CD45        |           |         |       |      |      |  |  |
|-----------|-----------|------------------|-----------|---------|-------|------|------|--|--|
| CD45      | CD3 T     | $\gamma\delta$ T | NKT       | CD8 T   | CD4 T | Treg |      |  |  |
|           | 99.9      | 99.7             | 0.04      | 0.014   | 93.9  | 3.4  | 0.52 |  |  |
|           |           | % of CD45        |           |         |       |      |      |  |  |
| CD8 PD1   | CD8 TIM3  | CD8 CM           | CD8 naïve | CD8EMRA | CD8EM |      |      |  |  |
|           | 51.6      | 93.4             | 0.002     | 0.003   | 36.5  | 58.6 |      |  |  |
|           |           | % of CD8 or CD4  |           |         |       |      |      |  |  |
| CD8 INFg  | CD4 IL17+ | CD4 IL22         | CD4 IFNg+ |         |       |      |      |  |  |
|           | 99.3      | 3.6              | 0.42      | 98.8    |       |      |      |  |  |

**Table S3.**

The final TIL product infused into the patient was analyzed by flow cytometry for phenotype and following stimulation with PMA/Ionomycin was stained intracellularly for cytokines. Percentages are percentages of CD45+ cells (top) or CD4 or CD8 Cells (bottom).

Table S4 Tumor specificity and class I blocking of initial TIL cultures

|                       | Pool T  | Pool R | Pool B  | Pool A  | Pool S  | Pool 1  | Pool 2  | Pool 3  | Pool 4  | Pool 5  | Pool 6  | Fragment 12 |
|-----------------------|---------|--------|---------|---------|---------|---------|---------|---------|---------|---------|---------|-------------|
| Tumor                 | 2179.50 | 752.12 | 2993.64 | 4427.63 | 2313.73 | 3409.99 | 7213.00 | 3722.50 | 3866.23 | 2914.58 | 3916.23 | 2.44        |
| Tumor + Class I Block | 94.32   | 11.95  | 67.49   | 38.78   | 67.88   | 75.74   | 394.68  | 258.88  | 86.28   | 369.32  | 513.78  | 2.44        |
| Media only            | 2.44    | 52.71  | 67.56   | 2.44    | 2.44    | 40.87   | 16.52   | 131.40  | 2.44    | 2.44    | 21.22   | 2.44        |
| PMA/Iono              | 2010.14 | 360.33 | 2563.22 | 2929.14 | 1203.62 | 2038.37 | 1565.83 | 1454.78 | 2757.56 | 2012.09 | 2155.09 | 2.44        |
| Percent Blocking      | 96%     | 98%    | 98%     | 99%     | 97%     | 98%     | 95%     | 93%     | 98%     | 87%     | 87%     | 0%          |

**Table S4**

TIL cultures derived from independent tumor fragments were incubated with a single cell suspension of autologous tumor in the presence or absence of class I HLA blocking antibody, and IFN- $\gamma$  release was measured by ELISA.

**Table S5** (included as excel file)

Individual TCRB clones with indicated CDR3 nucleotide sequences and their template frequency given as a percentage of total TCRB templates within the indicated samples. Self-antigen reactive CD8 clones are indicated in yellow, BRAF V600E reactive CD4 clones are indicated in blue, and the remainder of the top 34 TCRB clones in the TIL product are shown in green.

1. Dudley ME, Wunderlich J, Nishimura MI, Yu D, Yang JC, Topalian SL, Schwartzentruber DJ, Hwu P, Marincola FM, and Sherry R. Adoptive transfer of cloned melanoma-reactive T lymphocytes for the treatment of patients with metastatic melanoma. *Journal of immunotherapy*. 2001;24(4):363-73.
2. Riddell SR, and Greenberg PD. The use of anti-CD3 and anti-CD28 monoclonal antibodies to clone and expand human antigen-specific T cells. *Journal of immunological methods*. 1990;128(2):189-201.
3. Tran E, Turcotte S, Gros A, Robbins PF, Lu Y-C, Dudley ME, Wunderlich JR, Somerville RP, Hogan K, and Hinrichs CS. Cancer immunotherapy based on mutation-specific CD4+ T cells in a patient with epithelial cancer. *Science*. 2014;344(6184):641-5.
4. Kreiter S, Selmi A, Diken M, Sebastian M, Osterloh P, Schild H, Huber C, Türeci Ö, and Sahin U. Increased antigen presentation efficiency by coupling antigens to MHC class I trafficking signals. *The Journal of Immunology*. 2008;180(1):309-18.
5. Engels B, Cam H, Schüler T, Indraccolo S, Gladow M, Baum C, Blankenstein T, and Uckert W. Retroviral vectors for high-level transgene expression in T lymphocytes. *Human gene therapy*. 2003;14(12):1155-68.
6. Sommermeyer D, Hudecek M, Kosasih PL, Gogishvili T, Maloney DG, Turtle CJ, and Riddell SR. Chimeric antigen receptor-modified T cells derived from defined CD8+ and CD4+ subsets confer superior antitumor reactivity in vivo. *Leukemia*. 2015.
7. Jones S, Peng PD, Yang S, Hsu C, Cohen CJ, Zhao Y, Abad J, Zheng Z, Rosenberg SA, and Morgan RA. Lentiviral vector design for optimal T cell receptor gene expression in the transduction of peripheral blood lymphocytes and tumor-infiltrating lymphocytes. *Human gene therapy*. 2009;20(6):630-40.
8. Lim CS, and Brown CM. Hepatitis B virus nuclear export elements: RNA stem-loop  $\alpha$  and  $\beta$ , key parts of the HBV post-transcriptional regulatory element. *RNA biology*. 2016;13(9):743-7.
9. Kuball J, Dossett ML, Wolfli M, Ho WY, Voss R-H, Fowler C, and Greenberg PD. Facilitating matched pairing and expression of TCR chains introduced into human T cells. *Blood*. 2007;109(6):2331-8.
10. Li H. Aligning sequence reads, clone sequences and assembly contigs with BWA-MEM. *arXiv preprint arXiv:13033997*. 2013.
11. Li H, and Durbin R. Fast and accurate short read alignment with Burrows–Wheeler transform. *Bioinformatics*. 2009;25(14):1754-60.

12. McKenna A, Hanna M, Banks E, Sivachenko A, Cibulskis K, Kernytsky A, Garimella K, Altshuler D, Gabriel S, and Daly M. The Genome Analysis Toolkit: a MapReduce framework for analyzing next-generation DNA sequencing data. *Genome research*. 2010;20(9):1297-303.
13. Auwera GA, Carneiro MO, Hartl C, Poplin R, del Angel G, Levy-Moonshine A, Jordan T, Shakir K, Roazen D, and Thibault J. From FastQ data to high-confidence variant calls: the genome analysis toolkit best practices pipeline. *Current protocols in bioinformatics*. 2013;11.0. 1-.0. 33.
14. Bergmann EA, Chen B-J, Arora K, Vacic V, and Zody MC. Conpair: concordance and contamination estimator for matched tumor–normal pairs. *Bioinformatics*. 2016;32(20):3196-8.
15. Cibulskis K, Lawrence MS, Carter SL, Sivachenko A, Jaffe D, Sougnez C, Gabriel S, Meyerson M, Lander ES, and Getz G. Sensitive detection of somatic point mutations in impure and heterogeneous cancer samples. *Nature biotechnology*. 2013;31(3):213-9.
16. Saunders CT, Wong WS, Swamy S, Becq J, Murray LJ, and Cheetham RK. Strelka: accurate somatic small-variant calling from sequenced tumor–normal sample pairs. *Bioinformatics*. 2012;28(14):1811-7.
17. Koboldt DC, Zhang Q, Larson DE, Shen D, McLellan MD, Lin L, Miller CA, Mardis ER, Ding L, and Wilson RK. VarScan 2: somatic mutation and copy number alteration discovery in cancer by exome sequencing. *Genome research*. 2012;22(3):568-76.
18. Ramos AH, Lichtenstein L, Gupta M, Lawrence MS, Pugh TJ, Saksena G, Meyerson M, and Getz G. Oncotator: cancer variant annotation tool. *Human mutation*. 2015;36(4):E2423-E9.
19. Li B, and Dewey CN. RSEM: accurate transcript quantification from RNA-Seq data with or without a reference genome. *BMC bioinformatics*. 2011;12(1):323.
20. Chow I-T, Yang J, Gates TJ, James EA, Mai DT, Greenbaum C, and Kwok WW. Assessment of CD4+ T Cell Responses to Glutamic Acid Decarboxylase 65 Using DQ8 Tetramers Reveals a Pathogenic Role of GAD65 121–140 and GAD65 250–266 in T1D Development. *PloS one*. 2014;9(11):e112882.
